# Supplementary material for: Assessment of different techniques for 3D superimposition of serial digital maxillary dental casts on palatal structures
Source: PubMed Central journal article supplement (PMC5517608; doi:10.1038/s41598-017-06013-5), 2017-07-19
Supplement: 41598_2017_6013_MOESM1_ESM.pdf [file 41598_2017_6013_MOESM1_ESM.pdf]

**Assessment of different techniques for 3D superimposition of serial digital maxillary dental casts on palatal structures**

Georgios Vasilakos, Roman Schilling, Demetrios Halazonetis & Nikolaos Gkantidis

**Supplementary Table S1. Mean of absolute differences of tooth movement measurements performed by the two operators.**

|                             |           | <b>A</b> | <b>B</b> | <b>C</b> | <b>D</b> | <b>E</b> |
|-----------------------------|-----------|----------|----------|----------|----------|----------|
| <b>Linear measurements</b>  |           |          |          |          |          |          |
| <b>Incisor</b>              | X (mm)    | 0.21     | 0.29     | 0.28     | 0.08     | 0.78     |
|                             | Y (mm)    | 0.15     | 0.13     | 0.13     | 0.08     | 0.44     |
|                             | Z (mm)    | 0.25     | 0.28     | 0.17     | 0.10     | 0.72     |
| <b>Molar R</b>              | X         | 0.10     | 0.10     | 0.11     | 0.02     | 0.16     |
|                             | Y         | 0.17     | 0.24     | 0.21     | 0.04     | 0.75     |
|                             | Z         | 0.23     | 0.23     | 0.27     | 0.10     | 0.34     |
| <b>Molar L</b>              | X         | 0.10     | 0.12     | 0.11     | 0.02     | 0.18     |
|                             | Y         | 0.23     | 0.20     | 0.22     | 0.09     | 0.87     |
|                             | Z         | 0.21     | 0.25     | 0.32     | 0.08     | 0.38     |
|                             | Median    | 0.21     | 0.23     | 0.21     | 0.08     | 0.44     |
| <b>Angular measurements</b> |           |          |          |          |          |          |
| <b>Incisor</b>              | X-rot (°) | 0.65     | 0.73     | 0.55     | 0.37     | 2.25     |
|                             | Y-rot (°) | 0.70     | 0.86     | 0.71     | 0.54     | 0.88     |
|                             | Z-rot (°) | 0.45     | 0.74     | 0.62     | 0.28     | 1.98     |
| <b>Molar R</b>              | X-rot     | 0.51     | 0.57     | 0.30     | 0.21     | 2.29     |
|                             | Y-rot     | 0.54     | 0.64     | 0.85     | 0.18     | 0.89     |
|                             | Z-rot     | 0.48     | 0.68     | 0.72     | 0.18     | 1.76     |
| <b>Molar L</b>              | X-rot     | 0.65     | 0.69     | 0.41     | 0.28     | 2.44     |
|                             | Y-rot     | 0.53     | 0.65     | 0.89     | 0.20     | 0.92     |
|                             | Z-rot     | 0.65     | 0.71     | 0.63     | 0.37     | 1.97     |
|                             | Median    | 0.54     | 0.69     | 0.63     | 0.28     | 1.97     |

Friedman test showed significant differences between methods (p=0.000).

Pair-wise *a posteriori* tests between superimposition techniques using the *Wilcoxon signed-rank test* showed that all techniques differed significantly to each other except from techniques A from C and B from C (p<0.01; Bonferroni correction applied).

A, B, C, D, E correspond to the five superimposition techniques and reference areas tested in the study.

**Supplementary Table S2. Mean of absolute differences of tooth movement measurements performed at two different time points.**

|                             |           | <b>A</b> | <b>B</b> | <b>C</b> | <b>D</b> | <b>E</b> |
|-----------------------------|-----------|----------|----------|----------|----------|----------|
| <b>Linear measurements</b>  |           |          |          |          |          |          |
| <b>Incisor</b>              | X (mm)    | 0.18     | 0.32     | 0.25     | 0.11     | 0.57     |
|                             | Y (mm)    | 0.09     | 0.27     | 0.16     | 0.08     | 0.41     |
|                             | Z (mm)    | 0.19     | 0.20     | 0.20     | 0.08     | 0.59     |
| <b>Molar R</b>              | X         | 0.32     | 0.11     | 0.05     | 0.02     | 0.16     |
|                             | Y         | 0.53     | 0.27     | 0.25     | 0.13     | 0.67     |
|                             | Z         | 0.51     | 0.20     | 0.29     | 0.11     | 0.35     |
| <b>Molar L</b>              | X         | 0.36     | 0.09     | 0.08     | 0.02     | 0.10     |
|                             | Y         | 0.52     | 0.22     | 0.21     | 0.08     | 0.78     |
|                             | Z         | 0.58     | 0.22     | 0.32     | 0.08     | 0.31     |
|                             | Median    | 0.36     | 0.22     | 0.21     | 0.08     | 0.41     |
| <b>Angular measurements</b> |           |          |          |          |          |          |
| <b>Incisor</b>              | X-rot (°) | 0.58     | 1.22     | 0.82     | 0.47     | 1.60     |
|                             | Y-rot (°) | 0.78     | 1.68     | 0.84     | 0.54     | 0.90     |
|                             | Z-rot (°) | 0.53     | 0.69     | 0.68     | 0.30     | 1.72     |
| <b>Molar R</b>              | X-rot     | 0.97     | 0.70     | 0.48     | 0.34     | 1.80     |
|                             | Y-rot     | 0.90     | 0.53     | 0.63     | 0.17     | 0.85     |
|                             | Z-rot     | 1.03     | 0.73     | 0.71     | 0.34     | 1.48     |
| <b>Molar L</b>              | X-rot     | 0.95     | 0.57     | 0.58     | 0.40     | 1.73     |
|                             | Y-rot     | 1.13     | 0.50     | 0.93     | 0.22     | 0.91     |
|                             | Z-rot     | 1.18     | 0.76     | 0.77     | 0.53     | 1.70     |
|                             | Median    | 0.95     | 0.70     | 0.71     | 0.34     | 1.6      |

Friedman test showed significant differences between methods (p=0.000).

Pair-wise *a posteriori* tests between superimposition techniques using the *Wilcoxon signed-rank test* showed that all techniques differed significantly to each other except from techniques A from B and B from C (p<0.01; Bonferroni correction applied).

A, B, C, D, E correspond to the five superimposition techniques and reference areas tested in the study.

**Supplementary Table S3. Mean of absolute differences of tooth movement measurements performed with two different settings.**

|                             |           | <b>A</b> | <b>B</b> | <b>C</b> | <b>D</b> | <b>E</b> |
|-----------------------------|-----------|----------|----------|----------|----------|----------|
| <b>Linear measurements</b>  |           |          |          |          |          |          |
| <b>Incisor</b>              | X (mm)    | 0.13     | 0.17     | 0.17     | 0.11     | 0.40     |
|                             | Y (mm)    | 0.09     | 0.05     | 0.09     | 0.05     | 0.32     |
|                             | Z (mm)    | 0.14     | 0.12     | 0.11     | 0.07     | 0.27     |
| <b>Molar R</b>              | X         | 0.08     | 0.11     | 0.06     | 0.86     | 0.10     |
|                             | Y         | 0.10     | 0.11     | 0.17     | 0.71     | 0.45     |
|                             | Z         | 0.08     | 0.07     | 0.12     | 0.99     | 0.44     |
| <b>Molar L</b>              | X         | 0.05     | 0.04     | 0.05     | 0.03     | 0.15     |
|                             | Y         | 0.10     | 0.13     | 0.12     | 0.11     | 0.34     |
|                             | Z         | 0.09     | 0.08     | 0.13     | 0.05     | 0.36     |
|                             | Median    | 0.09     | 0.11     | 0.12     | 0.11     | 0.34     |
| <b>Angular measurements</b> |           |          |          |          |          |          |
| <b>Incisor</b>              | X-rot (°) | 0.59     | 0.55     | 0.62     | 0.33     | 1.05     |
|                             | Y-rot (°) | 0.84     | 0.79     | 0.75     | 0.53     | 1.03     |
|                             | Z-rot (°) | 0.44     | 0.62     | 0.51     | 0.50     | 1.52     |
| <b>Molar R</b>              | X-rot     | 0.34     | 0.21     | 0.40     | 0.25     | 0.74     |
|                             | Y-rot     | 0.20     | 0.40     | 0.35     | 0.17     | 1.13     |
|                             | Z-rot     | 0.47     | 0.56     | 0.54     | 0.58     | 1.19     |
| <b>Molar L</b>              | X-rot     | 0.35     | 0.23     | 0.33     | 0.28     | 0.90     |
|                             | Y-rot     | 0.29     | 0.38     | 0.44     | 0.29     | 1.21     |
|                             | Z-rot     | 0.39     | 0.49     | 0.41     | 0.32     | 1.18     |
|                             | Median    | 0.39     | 0.49     | 0.44     | 0.32     | 1.13     |

Friedman test showed significant differences between methods (p=0.000).

Pair-wise *a posteriori* tests between superimposition techniques using the *Wilcoxon signed-rank test* showed that all techniques differed significantly to each other except from techniques A from B, A from D, B from C, B from D, and C from D (p<0.01; Bonferroni correction applied).

A, B, C, D, E correspond to the five superimposition techniques and reference areas tested in the study.

**Supplementary Table S4. Differences between each superimposition technique from the “gold standard” technique considering the detected tooth movements. One sample t-test shows if the mean difference is significantly different from zero in each case.**

|                    |       | t      | df | P      | Mean Difference | 95% Confidence Interval |        |
|--------------------|-------|--------|----|--------|-----------------|-------------------------|--------|
|                    |       |        |    |        |                 | Lower                   | Upper  |
| <b>X (mm)</b>      | B - A | 0.663  | 47 | 0.511  | 0.015           | -0.031                  | 0.061  |
|                    | C - A | -1.065 | 47 | 0.292  | -0.059          | -0.171                  | 0.053  |
|                    | D - A | -0.886 | 47 | 0.380  | -0.068          | -0.221                  | 0.086  |
|                    | E - A | -1.882 | 47 | 0.066  | -0.211          | -0.437                  | 0.015  |
| <b>Y (mm)</b>      | B - A | 4.705  | 47 | 0.000* | 0.207           | 0.118                   | 0.296  |
|                    | C - A | -1.760 | 47 | 0.085  | -0.106          | -0.228                  | 0.015  |
|                    | D - A | 1.546  | 47 | 0.129  | 0.138           | -0.042                  | 0.318  |
|                    | E - A | 2.303  | 47 | 0.026  | 0.359           | 0.045                   | 0.672  |
| <b>Z (mm)</b>      | B - A | 0.922  | 47 | 0.361  | 0.050           | -0.059                  | 0.158  |
|                    | C - A | -0.430 | 47 | 0.669  | -0.043          | -0.246                  | 0.159  |
|                    | D - A | -1.425 | 47 | 0.161  | -0.100          | -0.241                  | 0.041  |
|                    | E - A | -0.616 | 47 | 0.541  | -0.057          | -0.244                  | 0.129  |
| <b>X – rot (°)</b> | B - A | 8.069  | 47 | 0.000* | 1.351           | 1.014                   | 1.688  |
|                    | C - A | -4.245 | 47 | 0.000* | -0.723          | -1.066                  | -0.380 |
|                    | D - A | 3.453  | 47 | 0.001* | 0.753           | 0.314                   | 1.191  |
|                    | E - A | 1.445  | 47 | 0.155  | 0.437           | -0.171                  | 1.045  |
| <b>Y – rot (°)</b> | B - A | 0.052  | 47 | 0.959  | 0.006           | -0.211                  | 0.223  |
|                    | C - A | -0.170 | 47 | 0.866  | -0.052          | -0.670                  | 0.565  |
|                    | D - A | -0.118 | 47 | 0.906  | -0.019          | -0.333                  | 0.296  |
|                    | E - A | 1.098  | 47 | 0.278  | 0.315           | -0.262                  | 0.892  |
| <b>Z – rot (°)</b> | B - A | 1.301  | 47 | 0.200  | 0.153           | -0.084                  | 0.390  |
|                    | C - A | -0.178 | 47 | 0.859  | -0.036          | -0.443                  | 0.370  |
|                    | D - A | 2.495  | 47 | 0.016  | 0.699           | 0.135                   | 1.263  |
|                    | E - A | 3.350  | 47 | 0.002  | 1.353           | 0.540                   | 2.166  |

\*p<0.002; Bonferroni correction applied

A, B, C, D, E correspond to the five superimposition techniques and reference areas tested in the study.

**Supplementary Table S5. Bivariate correlations (Spearman’s rho, 2-tailed) of patient’s age at treatment start and time lapse (T0 to T1) between serial dental models with accuracy values.**

|                                    | <b>A</b>   |          | <b>B</b>   |          | <b>C</b>   |          | <b>D</b>   |          | <b>E</b>   |          |
|------------------------------------|------------|----------|------------|----------|------------|----------|------------|----------|------------|----------|
|                                    | <b>rho</b> | <b>p</b> | <b>rho</b> | <b>p</b> | <b>rho</b> | <b>p</b> | <b>rho</b> | <b>p</b> | <b>rho</b> | <b>p</b> |
| <b>Operator 1 – Setting 1 – M1</b> |            |          |            |          |            |          |            |          |            |          |
| Patient age                        | 0.02       | 0.931    | -0.04      | 0.888    | 0.01       | 0.957    | 0.01       | 0.966    | 0.06       | 0.829    |
| T0-T1 time                         | 0.22       | 0.418    | 0.27       | 0.311    | 0.16       | 0.542    | 0.39       | 0.134    | 0.26       | 0.322    |
| <b>Operator 1 – Setting 1 – M2</b> |            |          |            |          |            |          |            |          |            |          |
| Patient age                        | 0.13       | 0.617    | 0.11       | 0.688    | 0.03       | 0.914    | 0.06       | 0.837    | 0.10       | 0.721    |
| T0-T1 time                         | 0.25       | 0.350    | 0.28       | 0.284    | 0.18       | 0.513    | 0.38       | 0.140    | 0.40       | 0.125    |
| <b>Operator 1 – Setting 2 – M1</b> |            |          |            |          |            |          |            |          |            |          |
| Patient age                        | 0.02       | 0.931    | -0.03      | 0.897    | 0.06       | 0.829    | 0.02       | 0.931    | -0.06      | 0.837    |
| T0-T1 time                         | 0.23       | 0.399    | 0.31       | 0.240    | 0.17       | 0.528    | 0.35       | 0.188    | 0.21       | 0.431    |
| <b>Operator 2 – Setting 1 – M1</b> |            |          |            |          |            |          |            |          |            |          |
| Patient age                        | 0.20       | 0.458    | 0.11       | 0.688    | 0.11       | 0.680    | 0.14       | 0.610    | -0.22      | 0.412    |
| T0-T1 time                         | 0.16       | 0.557    | 0.33       | 0.204    | 0.20       | 0.458    | 0.33       | 0.204    | 0.17       | 0.520    |

p<0.05

A, B, C, D, E correspond to the five superimposition techniques and reference areas tested in the study.

M: Measurement
